# Endocytic receptor-mediated control of morphogen signaling

Thomas E. Willnow\*, Annabel Christ and Annette Hammes

## Summary

Receptor-mediated endocytosis provides a mechanism by which cells take up signaling molecules from the extracellular space. Recent studies have shown that one class of endocytic receptors, the low-density lipoprotein receptor-related proteins (LRPs), is of particular relevance for embryonic development. In this Primer, we describe how LRPs constitute central pathways that modulate morphogen presentation to target tissues and cellular signal reception, and how LRP dysfunction leads to developmental disturbances in many species.

**Key words:** LDL receptor-related proteins, Endocytosis, Morphogens

## Introduction

Receptor-mediated endocytosis is the main mechanism by which cells are able to specifically take up macromolecules from the extracellular space. It is a fundamental process known to all eukaryotic cells. Depending on the type of receptor, the fate of ligands may entail degradation in lysosomes, re-secretion or transcytosis (Box 1). Initially, endocytosis was recognized as a pathway that could provide cells with essential nutrients and regulate the concentration of metabolites in extracellular fluids (e.g. cholesterol in the circulation). However, endocytosis has more recently proved to be a versatile pathway that is vital to many cellular activities, including control of growth and differentiation, cell migration and synaptic transmission (reviewed by McMahon and Boucrot, 2011). As well as being important in the adult organism, receptor-mediated endocytosis has emerged as a central mechanism that can influence embryonic development. We owe this recognition largely to the identification of a unique class of endocytic receptors, termed low-density lipoprotein (LDL) receptor-related proteins (LRPs), that regulate many aspects of development in vertebrate and invertebrate species. In this Primer, we summarize recent data that uncovered the sophisticated molecular mechanisms by which LRPs modulate signal transduction pathways. These findings have not only advanced our knowledge about the functional properties of a distinct class of endocytic receptors in embryonic tissues, but have also changed our perception of regulatory concepts in development.

## LRPs: endocytic receptors that control embryonic development

### The LDL receptor gene family

Much of our insight into the functional organization of endocytic receptors stems from studies of the LDL receptor, a type-I membrane protein expressed in all vertebrate cell types (Goldstein et al., 2001). It displays the typical arrangement of domains

required for endocytosis (Fig. 1), namely an extracellular domain containing sites for ligand binding and for pH-dependent release of such ligands in endosomes (Rudenko et al., 2002). In addition, its cytoplasmic tail harbors interaction motifs for cytosolic adaptor proteins that guide shuttling of the receptor between the plasma membrane and endocytic compartments. The main function of the LDL receptor is the cellular uptake of cholesterol-rich low-density lipoproteins (LDLs; see Glossary, Box 2) from the circulation. The significance of this receptor for cholesterol homeostasis is underscored by the pathological features of patients with inheritable LDL receptor gene defects in familial hypercholesterolemia (FH; see Glossary, Box 2). FH results in the inability to clear LDL from the blood stream, leading to excessive levels of circulating cholesterol and premature death from coronary artery disease (Goldstein et al., 2001).

Through cloning efforts, it soon became apparent that the LDL receptor is not unique but is a member of a group of closely related endocytic receptors designated LDL receptor-related proteins, or LRPs. The modular structure of the extracellular domains of individual LRPs (Fig. 1) is conserved throughout evolution from nematodes to mammals. By contrast, their cytoplasmic domains share little sequence similarity, with the exception of a short amino acid motif (NPxY) that is required for clathrin-mediated endocytosis (Box 1). This finding suggested distinct functions performed by the various receptor species, a notion that was confirmed when animal models and humans with LRP gene defects were characterized.

### LRP activities: insights from loss-of-function studies

The LDL receptor appeared to be dispensable for embryogenesis, as judged by the normal development of organisms lacking this receptor (Ishibashi et al., 1993; Goldstein et al., 2001). Thus, it came as a surprise when loss of expression of other family members had profound consequences on developmental processes in many phyla (Table 1). In some instances, linking developmental defects to impaired lipoprotein metabolism was obvious, as was the case with mutations in genes encoding vitellogenin (see Glossary, Box 2) receptors in egg-laying species. For example, loss of receptor activity in the *C. elegans rme-2* mutant (Grant and Hirsh, 1999), in the *Drosophila yolkless* mutant (Schonbaum et al., 1995) and in the chicken *restricted ovulator* strain (Bujo et al., 1995) prevents the deposition of yolk (vitellogenesis), thereby causing female sterility.

For other receptors, the interpretation of phenotypes had been complicated by the fact that, in contrast to the LDL receptor, LRPs bind not only lipoproteins but also a multitude of different macromolecules, including proteases, vitamin carriers and signaling factors. Based on the respective phenotypes in gain- and loss-of-function models, these LRPs may be categorized into two groups: those affecting early patterning and those with later embryonic functions. Exemplifying early patterning defects, *arrow/Lrp6* mutations in fruit fly, frog and mouse result in axial

Max-Delbrueck-Center for Molecular Medicine, D-13125 Berlin, Germany.

\*Author for correspondence (willnow@mdc-berlin.de)

**Box 1. Cell biology of receptor-mediated endocytosis**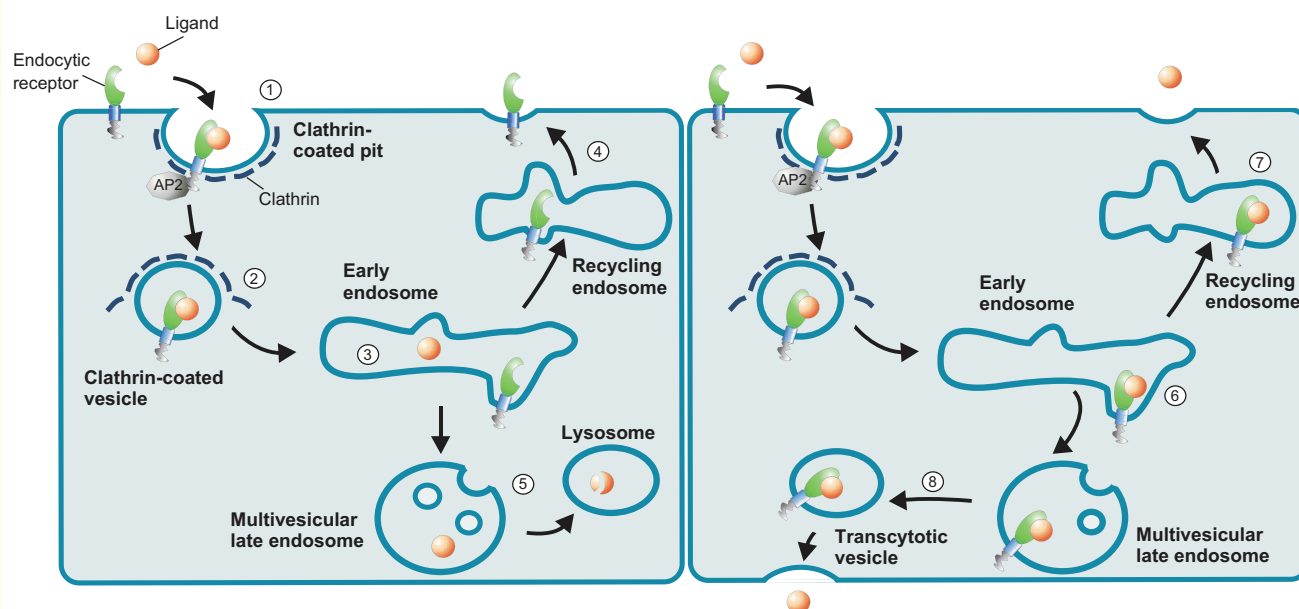

Endocytosis starts with an extracellular ligand (orange) binding to its receptor (green) at the cell surface. Receptor-cargo complexes move to regions of the plasma membrane marked by a cytosolic lattice of proteins, of which clathrin is the major component, leading to clathrin-mediated endocytosis (step 1). Targeting of endocytic receptors to clathrin-coated pits involves adaptor complexes, such as ubiquitous adaptor protein 2 (AP2; gray), or receptor-selective adaptors, such as mammalian Disabled-2 (DAB2; not shown). These adaptors interact with internalization motifs in the cytoplasmic domain of receptors and, directly or indirectly, tether the receptors to the clathrin coat. Invagination of the plasma membrane produces a clathrin-coated vesicle (step 2) carrying receptor and cargo into the cell. Removal of the clathrin coat enables these vesicles to fuse with early endosomes in which a drop in luminal pH typically disrupts ligand and receptor interaction (step 3). 'Un-liganded' receptors recycle back to the cell surface to undergo the next endocytic cycle (step 4), whereas ligands move through a multivesicular, late endosomal compartment to lysosomes (step 5). Most endocytic receptors follow this pathway, which results in lysosomal degradation of their load. However, some ligand/receptor complexes resist the low pH in early endosomes (step 6). They recycle back to the cell surface, causing re-secretion of ligands (step 7). A third route, which occurs in polarized epithelia, involves receptors that traffic their cargo from the basolateral to the apical plasma membrane (or vice versa), enabling transcytosis of ligands (step 8). Endocytosis may proceed constitutively (as for the low-density lipoprotein receptor) or be triggered by ligand binding (as for the epidermal growth factor receptor).

truncation and abnormal head and limb structures, phenocopies of defects in Wnt signaling pathways (Pinson et al., 2000; Tamai et al., 2000; Wehrli et al., 2000). Furthermore, inactivation of *Lrp1b*, a receptor expressed in the neural tube, in mice causes early embryonic lethality, although the mechanism underlying this phenotype has not yet been elucidated (Dietrich et al., 2010). LRP5 that affect later stages of development include LRP4, a receptor expressed in limb, kidney and reproductive tract, and LRP5. Loss of LRP4 in mice results in abnormal limb development, renal agenesis and defects in neuromuscular junction (NMJ; see Glossary, Box 2) formation (Johnson et al., 2005; Simon-Chazottes et al., 2006; Weatherbee et al., 2006). Abnormal distal limb development and kidney malformations are also seen in humans with *LRP4* defects (Cenani-Lenz syndrome) (Li et al., 2010). *LRP5* mutations affect retinal development and bone formation in humans and in animal models, with high- and low-bone mass traits associated with gain- or loss-of-function mutations, respectively (Table 1). These phenotypes were also traced to abnormal Wnt signaling (Boyden et al., 2002). Finally, two receptor pathways were shown to be crucial for development of the central nervous system. Loss of the related very low density lipoprotein (VLDL; CD320 – Mouse Genome Informatics) receptor (VLDLR) and LRP8 (also known as apolipoprotein receptor-2) in mice causes abnormal layering of neurons in the cortex and cerebellum

(Trommsdorff et al., 1999). Patients with VLDL receptor deficiency suffer from cerebellar hyperplasia and ataxia (see Glossary, Box 2) (Boycott et al., 2005; Ozcelik et al., 2008). Absence of LRP2 (also known as megalin), a receptor expressed in the neuroepithelium, in mice results in forebrain patterning defects defined as holoprosencephaly (see Glossary, Box 2) (Willnow et al., 1996). Related phenotypes are seen in patients with Donnai-Barrow syndrome (Rosenfeld et al., 2010), an autosomal recessive disorder caused by familial *LRP2* deficiency. Defects in several morphogen pathways, including the sonic hedgehog (SHH) pathway, have been implicated in *LRP2*-deficiency phenotypes (Spoelgen et al., 2005; Christ et al., 2012).

### Mechanisms of LRP-mediated control of development

What sounded like a plethora of unrelated functions performed by a group of multifunctional endocytic receptors, later turned out to be phenotypic consequences of a single unifying mechanism: the control of morphogen presentation to target tissues. Below, we describe the molecular mechanisms by which LRPs regulate embryonic development. These mechanisms include control of morphogen gradient formation, determination of local concentrations in the target field, as well as modulation of the cellular competence for signal reception.

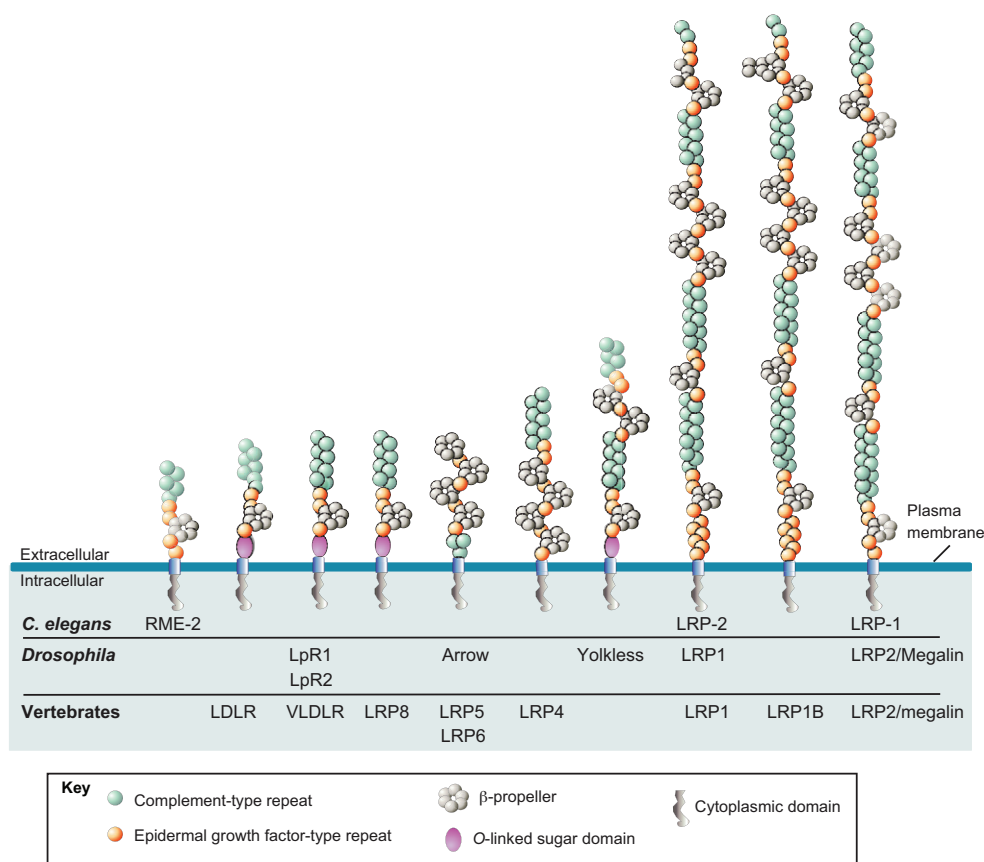

**Fig. 1. The LDL receptor gene family.** Structural organization of members of the LDL receptor gene family in *C. elegans*, *Drosophila* and vertebrates (sorted by molecular weight). Their extracellular domains are composed of clusters of complement-type repeats and  $\beta$ -propellers; both of these elements constitute binding sites for ligands. In addition,  $\beta$ -propellers are essential for pH-dependent release of ligands in endosomes. The cytoplasmic tails harbor recognition sites for adaptor proteins involved in coated-pit endocytosis, intracellular protein trafficking and signal transduction. Most receptors are built from a unifying module of N-terminal complement-type repeats followed by a carboxyl terminal cluster of  $\beta$ -propellers. This module can be found as one copy (e.g. in LDLR) or as multiple copies (e.g. in LRP2) in the receptors. Arrow, LRP5 and LRP6 are distinct as this module is inverted in their extracellular domains. LDLR, low-density lipoprotein receptor; LpR, lipophorin receptor; LRP, LDL receptor-related protein; RME-2, receptor-mediated endocytosis-2; VLDLR, very low-density lipoprotein receptor.

### LRPs control the graded concentration of morphogens

The graded activity of morphogens is crucial for establishing region-specific responses in target tissues and for patterning the embryo. A prevailing concept states that passive diffusion of a morphogen from a local source to a target field establishes a long-range gradient, with diffusion parameters being largely determined by the biophysical properties of the secreted factor. In addition, specific mechanisms modulate the rate at which morphogens travel, including attachment to transport vehicles (e.g. lipoproteins), trapping by cell-surface binding sites (e.g. heparan sulfate proteoglycans) and active transport (planar transcytosis). There are several excellent reviews on this topic (Zhu and Scott, 2004; Rogers and Schier, 2011). Here, we will discuss how endocytic receptors modulate gradient formation by restricting morphogen spread or, in the converse situation, by promoting cellular release of signaling factors.

One system that is widely used to study gradient formation is the *Drosophila* wing imaginal disc (see Glossary, Box 2), the precursor to the fly wing. Patterning of the wing disc requires the formation of morphogen gradients of several factors, including Hedgehog (Hh), the Wnt family protein Wingless (Wg) and Decapentaplegic (Dpp), a homolog of vertebrate bone morphogenetic proteins (BMPs). Blocking endocytosis in target cells by expressing a mutant form of dynamin (see Glossary, Box 2) results in a failure of Dpp to move from its source and establish a gradient (Entchev et al., 2000). The formation of Dpp gradients is promoted by association of Dpp with a vitellogenin-like protein called Crossveinless d (Chen et al., 2012). Remarkably, the association of Wg and Hh with lipophorins, another class of lipoproteins in the fly, is also crucial for formation of the respective gradients, as RNAi knockdown of lipophorin expression impairs morphogen

spread in the wing imaginal disc (Panáková et al., 2005). Taken together, these findings indicate that lipoproteins act as vehicles for movement of morphogens, and that, in some instances, this movement involves receptor-mediated transcytosis through the

### Box 2. Glossary

**Ataxia.** Impaired coordination of muscle movement due to neurological dysfunctions.

**Dynamin.** A cytosolic protein required for 'pinching-off' of clathrin-coated vesicles.

**Familial hypercholesterolemia (FH).** Pathological increase in the level of cholesterol in the circulation.

**Holoprosencephaly.** Fusion of the forebrain hemispheres.

**Imaginal discs.** Clusters of embryonic cells that form various parts of the exoskeleton structures of the fly during the pupal stage.

**Cortical lamination.** Formation of the cortical layers in the brain by distinct neuronal subtypes.

**Low-density lipoproteins (LDLs).** Macromolecular lipid-protein complexes that transport cholesterol and other types of lipids in the circulation.

**Metabolic syndrome.** Condition characterized by a combination of cardiovascular and metabolic disturbances, including hyperlipidemia, high blood pressure, obesity and diabetes.

**Myoblasts.** Progenitor cells that give rise to muscle cells.

**Neuromuscular junction (NMJ).** A specialized synapse that mediates communication between a motoneuron and a muscle fiber.

**Smith-Lemli-Opitz syndrome.** Inborn error in the 7-dehydrocholesterol reductase gene resulting in lack of cholesterol biosynthesis, cleft palate and holoprosencephaly.

**Vitellogenins.** Glycolipoproteins in egg-laying species that deliver nutritional lipids (yolk) to the embryo prior to egg deposition.

Table 1. Loss- and gain-of-function models of LRP

| Receptor       | Organism                                | Type of mutant                                                              | Phenotype/disease                                                                                                                                                                                                 | References                                                                                                                                                                        |
|----------------|-----------------------------------------|-----------------------------------------------------------------------------|-------------------------------------------------------------------------------------------------------------------------------------------------------------------------------------------------------------------|-----------------------------------------------------------------------------------------------------------------------------------------------------------------------------------|
| RME-2          | <i>C. elegans</i>                       | Loss of function (spontaneous mutant)                                       | Impaired yolk deposition, reduced embryonic viability                                                                                                                                                             | (Grant and Hirsh, 1999)                                                                                                                                                           |
| VLDL receptor  | Mouse                                   | Loss of function (targeted gene disruption)                                 | Dysplastic cerebellum, abnormal cortical layering, absent rostral migratory stream                                                                                                                                | (Trommsdorff et al., 1999; Andrade et al., 2007; Hack et al., 2007)                                                                                                               |
|                | Chicken                                 | Loss of function (spontaneous mutant)                                       | Impaired vitellogenesis, female sterility                                                                                                                                                                         | (Bujo et al., 1995)                                                                                                                                                               |
|                | Human                                   | Loss of function (familial, autosomal recessive)                            | Cerebellar hypoplasia, ataxia, mental retardation                                                                                                                                                                 | (Boycott et al., 2005; Ozcelik et al., 2008)                                                                                                                                      |
| LRP8 (APOER2)  | Mouse                                   | Loss of function (targeted gene disruption)                                 | Dysplastic hippocampus and cerebellum, impaired retinal synaptic connectivity                                                                                                                                     | (Trommsdorff et al., 1999; Trotter et al., 2011)                                                                                                                                  |
| LRP5           | Mouse                                   | Loss of function (targeted gene disruption)                                 | Low bone mass, hypercholesterolemia, impaired insulin secretion, impaired retinal vascularization, impaired mammary development                                                                                   | (Kato et al., 2002; Fujino et al., 2003; Lindvall et al., 2006; Ye et al., 2009)                                                                                                  |
|                | Human                                   | Loss of function (familial, autosomal recessive)                            | Osteoporosis-Pseudoglioma Syndrome (reduced bone mass, persistent embryonic eye vascularization)                                                                                                                  | (Gong et al., 2001)                                                                                                                                                               |
|                | Human                                   | Gain of function (familial, autosomal dominant)                             | High-bone-mass trait                                                                                                                                                                                              | (Little et al., 2002)                                                                                                                                                             |
|                | Human                                   | Mutations (familial, autosomal recessive)                                   | Familial exudative vitreoretinopathy                                                                                                                                                                              | (Toomes et al., 2004)                                                                                                                                                             |
| LRP6           | Mouse                                   | Loss of function (targeted gene disruption)                                 | Abnormal patterning of body axis, neural tube and limb defects, orofacial abnormalities, cardiac neural crest and outflow tract defects, hypoplasia of neocortex, ocular coloboma, neuroretinal patterning defect | (Pinson et al., 2000; Zhou et al., 2006; Zhou et al., 2008; Song et al., 2009; Song et al., 2010)                                                                                 |
|                | Crooked tail mouse                      | <i>Lrp6<sup>+/+</sup></i>                                                   | Protection against diet-induced obesity                                                                                                                                                                           | (Liu et al., 2012)                                                                                                                                                                |
|                |                                         | Gain of function (spontaneous nucleotide substitution)                      | Neural tube defect                                                                                                                                                                                                | (Carter et al., 2005)                                                                                                                                                             |
|                | <i>Xenopus</i>                          | Loss of function (spontaneous mutant)                                       | Impaired dorsal axis and neural crest formation                                                                                                                                                                   | (Tamai et al., 2000)                                                                                                                                                              |
|                | Human                                   | Missense mutation (familial, autosomal dominant)                            | Autosomal dominant early coronary artery disease                                                                                                                                                                  | (Mani et al., 2007)                                                                                                                                                               |
| Arrow          | <i>Drosophila</i>                       | Loss of function (spontaneous mutant)                                       | Inhibition of Wingless-dependent patterning                                                                                                                                                                       | (Wehrli et al., 2000)                                                                                                                                                             |
| LRP4           | Mouse                                   | Loss of function (ENU mutagenesis, spontaneous mutant, targeted disruption) | Impaired limb formation, renal agenesis, impaired orofacial development, neuromuscular junction defects                                                                                                           | (Johnson et al., 2005; Simon-Chazottes et al., 2006; Weatherbee et al., 2006; Zhou et al., 2006; Kim et al., 2008; Zhang et al., 2008; Karner et al., 2010; Ohazama et al., 2010) |
|                | Cattle                                  | Loss of function (spontaneous mutant)                                       | Mulefoot disease (syndactyly)                                                                                                                                                                                     | (Duchesne et al., 2006; Johnson et al., 2006; Drögemüller et al., 2007)                                                                                                           |
|                | Human                                   | Loss of function (familial, autosomal recessive)                            | Cenani-Lenz syndrome (limb and kidney malformations)                                                                                                                                                              | (Li et al., 2010)                                                                                                                                                                 |
| Yolkless       | <i>Drosophila</i>                       | Loss of function (X-ray-induced mutant)                                     | Impaired vitellogenesis, female sterility                                                                                                                                                                         | (DiMario and Mahowald, 1987)                                                                                                                                                      |
| LRP1           | Mouse                                   | Loss of function (targeted gene disruption)                                 | Embryonic lethality, impaired formation of liver                                                                                                                                                                  | (Herz et al., 1992; Roebroek et al., 2006)                                                                                                                                        |
| LRP1B          | Mouse                                   | Loss of function (targeted gene disruption)                                 | Early embryonic lethality                                                                                                                                                                                         | (Dietrich et al., 2010)                                                                                                                                                           |
|                | Human                                   | Loss of function (sporadic)                                                 | Esophageal squamous cell carcinoma, non-small-cell lung cancer                                                                                                                                                    | (Liu et al., 2000; Sonoda et al., 2004)                                                                                                                                           |
| LRP2 (megalin) | Mouse                                   | Loss of function (targeted gene disruption)                                 | Defects in development of forebrain, spinal cord and optic nerve, impaired maturation of reproductive organs, renal dysfunction                                                                                   | (Willnow et al., 1996; Hammes et al., 2005; Spoelgen et al., 2005; Wicher and Aldskogius, 2008; Ortega et al., 2012)                                                              |
|                | Zebrafish ( <i>bugeye</i> )             | Loss of function (ENU mutagenesis)                                          | Glaucoma, myopia, pronephric tubular clearance defects                                                                                                                                                            | (Kur et al., 2011; Veth et al., 2011)                                                                                                                                             |
|                | <i>C. elegans</i> ( <i>lrp-1</i> -null) | Loss of function (spontaneous mutant)                                       | Molting defect, larval growth arrest, defective vulva development                                                                                                                                                 | (Yochem et al., 1999; Kamikura and Cooper, 2003)                                                                                                                                  |
|                | Human                                   | Loss of function (familial, autosomal recessive)                            | Donnai-Barrow Syndrome (proteinuria, brain malformation, diaphragmatic hernia), microform of HPE                                                                                                                  | (Kantarci et al., 2007; Rosenfeld et al., 2010)                                                                                                                                   |



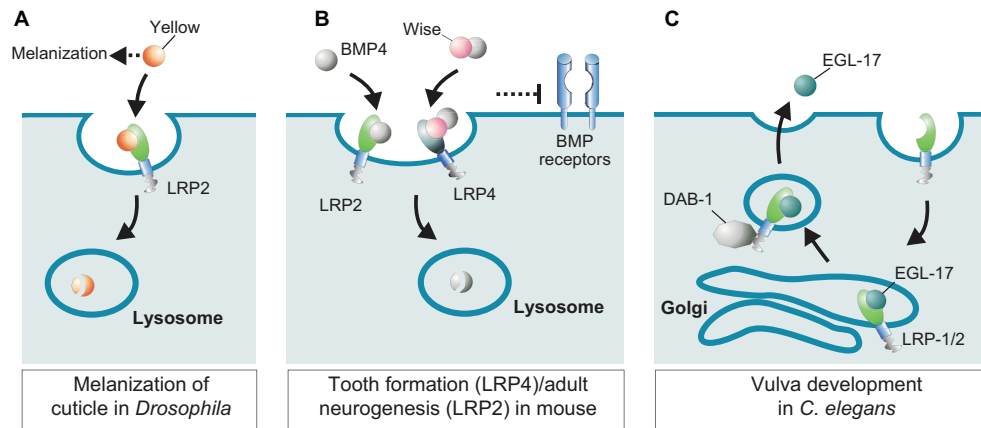

**Fig. 2. LRP control the graded concentrations of signaling molecules.** (A) In the *Drosophila* wing imaginal disc, LRP2/Megalin-dependent uptake and lysosomal degradation of Yellow restricts melanization to distinct layers of the wing cuticle. (B) In mouse, bone morphogenetic proteins (BMPs) signal through BMP receptors at the cell surface. The clearance of BMPs by LRP2 or of Wise-BMP complexes by LRP4 reduces the local concentration of BMPs and thus antagonizes BMP signaling. (C) In *C. elegans*, the release of egg-laying defective 17 (EGL-17) requires the redundant activities of LRP-1 and LRP-2, which guide nascent EGL-17 molecules through the biosynthetic pathway to the cell surface. The release of EGL-17 also requires the activity of the adaptor protein DAB-1. The interaction of DAB-1 with Ce-LRP1/2 proceeds in a post-Golgi compartment (probably secretory and/or endocytic vesicles) and is essential for proper receptor trafficking between cell surface and intracellular compartments.

target field. Although it is tempting to speculate that LRPs might be involved in vesicular transport of lipoprotein-bound morphogens, this hypothesis has not yet been proven. The ability of LRP2/Megalin to control the spread of Yellow, another secreted factor, in the imaginal disc might, however, serve as an explanatory model (Fig. 2A). Yellow is a secreted factor that regulates synthesis of black melanin, a pigment deposited in defined layers of the *Drosophila* wing. LRP2/Megalin-mediated endocytosis restricts Yellow to distinct layers of the cuticle and controls spatial melanization (Riedel et al., 2011).

#### LRPs control the local concentration of morphogens

Within the target field, the microenvironment of growth factors and morphogens is a crucial determinant of the tissue response to extracellular cues. Endocytic receptors are also involved in control of local morphogen concentration, as exemplified by LRP2, LRP4 and *C. elegans* (Ce) LRP-1 and LRP-2. In mammals, LRP2 is expressed in ependymal cells lining the lateral ventricles of the brain (Gajera et al., 2010). In the subventricular zone (SVZ), a neurogenic niche in the adult forebrain, competing signals provided by SHH and BMP regulate the rate of neural stem cell proliferation (reviewed by Kriegstein and Alvarez-Buylla, 2009). Loss of LRP2 in mice results in a decrease in size of the neural stem cell population in the SVZ and a decline in proliferative capacity that coincides with an increase in BMP2 and BMP4 expression and activity (Gajera et al., 2010). Because LRP2 mediates cellular uptake and degradation of BMP4 (Spoelgen et al., 2005), a role for this endocytic pathway in balancing proliferative and non-proliferative cell fates through BMP has been proposed (Fig. 2B). Similarly, during murine tooth development, the binding of BMP to the secreted antagonist Wise (SOSTDC1 – Mouse Genome Informatics) results in sequestration of BMP by LRP4, thus antagonizing BMP receptor signaling (Ohazama et al., 2008) (Fig. 2B). Unexpectedly, LRPs even promote secretion of morphogens, as documented for Ce-LRPs and egg-laying defective 17 (EGL-17), a fibroblast growth factor-like protein in nematodes. Ce-LRP1 and Ce-LRP2 (Fig. 1) are *C. elegans* homologs of vertebrate LRP1 and LRP2, respectively, that are expressed in cells of the

developing worm vulva and gonads. They bind newly synthesized EGL-17 in the secretory pathway of producing cells enabling cellular release of this factor. Secreted EGL-17 then serves as an attractive cue for myoblasts (see Glossary, Box 2) that migrate into the gonad center to generate uterine and vulva musculature (Kamikura and Cooper, 2003). Furthermore, Ce-LRP1/2-dependent secretion of EGL-17 requires the activity of Ce-disabled-1 (Ce-DAB-1), a receptor-specific adaptor found in nematodes (Kamikura and Cooper, 2003) and mammals (Dab2) (Morris et al., 2002).

#### LRPs modulate cellular morphogen signal reception

As well as controlling the graded and local concentrations of morphogens, endocytosis also modulates signal reception by target cells. Such cell-intrinsic functions were recognized early on, when it was shown that binding of a signaling molecule (e.g. epidermal growth factor) to its receptor induces internalization and lysosomal catabolism of the ligand and sometimes even the receptor. Obviously, this mechanism can serve to terminate signaling (reviewed by McMahon and Boucrot, 2011); however, endocytic receptors can be even more sophisticated in controlling cellular signal reception, as we describe below. For simplicity, we focus on proximal events at the cell surface whereby exposure or removal of endocytic receptors, or clearance of ligands, controls the presentation of morphogens to target cells. Concerning the respective downstream signal transduction mechanisms, the reader is referred to detailed reviews on these pathways elsewhere (He et al., 2004; Herz and Chen, 2006; Niehrs and Shen, 2010; Clevers and Nusse, 2012).

In the most basic scenario, an LRP can act as a surface binding site for a signaling molecule and interacts with an effector to transmit this signal into the cell. This concept is exemplified by LRP4 (also known as multiple epidermal growth factor-type repeat containing protein-7) at the NMJ. Formation of the NMJ during development requires the neurally derived ligand agrin and muscle-specific receptor tyrosine kinase (MusK). Defects in NMJ formation result in defective innervation of muscle tissue, a phenotype seen in *Lrp4*-null mice (Weatherbee et al., 2006). Recent studies from several

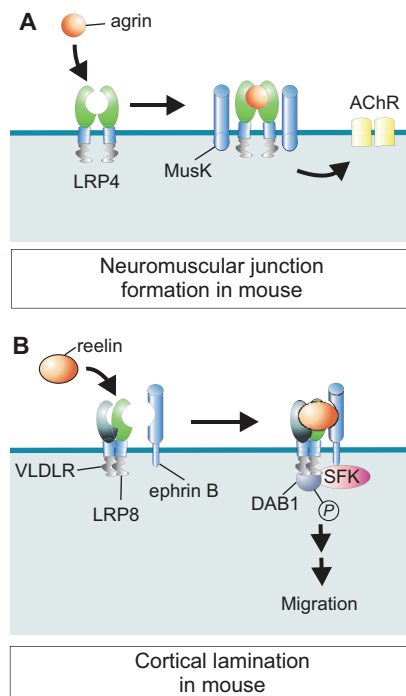

**Fig. 3. LRP4 regulate signaling at the cell surface.** (A) Formation of the neuromuscular junction is regulated by LRP4, which self-associates to form a binding site for agrin at the surface of myotubes. The binding of agrin to LRP4 then promotes interaction of LRP4 with muscle-specific kinase (MusK), resulting in activation of the kinase. MusK then triggers events required to form the postsynaptic apparatus on muscle cells, including the clustering of acetylcholine receptors (AChRs). (B) The migration of newborn neurons in the developing mammalian cortex is controlled by LRP8 and the VLDL receptor (VLDLR). Reelin binds to complexes of LRP8 and VLDLR and to ephrin B at the neuronal cell surface. The subsequent recruitment of Src family kinases (SFK) by ephrin B results in phosphorylation of DAB1 clustered at the receptor tails, initiating a cascade of cytosolic kinase reactions that ultimately result in rearrangement of the cytoskeleton and control of cell migration.

laboratories have elucidated the molecular mechanism underlying this phenotype, demonstrating that LRP4 self-associates to form a binding site for agrin at the surface of myotubes (Kim et al., 2008; Zhang et al., 2008). The binding of agrin to LRP4 then promotes interaction of the receptor with MusK, resulting in activation of the kinase and induction of the downstream effects required to form the postsynaptic membrane of the synapse (Fig. 3A). Remarkably, the soluble extracellular domain of LRP4 is sufficient to stimulate agrin-dependent synapse formation in isolated myotubes, arguing that the transmembrane and cytoplasmic regions of LRP4 are dispensable for receptor activity (Gomez and Burden, 2011). Although LRP4 does not require endocytic activity to promote NMJ formation, it can act as an endocytic receptor in other biological systems. For example, the mammalian protein has been implicated in WNT and BMP pathways during limb, bone and tooth development, although the mechanisms underlying these interactions still warrant clarification (Fig. 2B) (Johnson et al., 2005; Ohazama et al., 2008; Choi et al., 2009).

VLDLR and LRP8 are also receptors that form ligand-binding sites on target cells, but these receptors require their intracellular domains for signal transduction (Fig. 3B). They perform partially overlapping functions in directing migration of neurons in the

developing mammalian brain, as shown in mice that lack either receptor, or both (Trommsdorff et al., 1999). During cortical lamination (see Glossary, Box 2), newborn neurons migrate from the proliferative zone to their final destination in the neocortex, generating a stereotypical pattern of different neuronal subtypes. Their migration is guided by a gradient of reelin, a signaling molecule that provides positional cues. Reelin acts by binding to VLDLR and LRP8 at the neuronal cell surface, resulting in clustering of the adaptor DAB1, which binds to the receptor tails. Subsequent phosphorylation of DAB1 by members of the Src family of kinases (SFKs) initiates a cytosolic kinase cascade, ultimately resulting in rearrangement of the cytoskeleton and control of migration (reviewed by Herz and Chen, 2006). Recruitment of SFKs into this signaling complex requires ephrin B, a transmembrane protein that also binds reelin (Sentürk et al., 2011). Reelin signaling through VLDLR and LRP8 does not necessitate endocytosis. However, phosphorylated DAB1 becomes ubiquitinated, a modification that may cause internalization of receptor-DAB1 complexes thereby 'turning down' reelin signals (Bock et al., 2004).

LRP5 and LRP6 are LRP4s that form signaling complexes, with their function being tightly controlled by endocytosis. Studies by many groups have elucidated in detail how LRP5 and LRP6 act as co-receptors for the Wnt receptor Frizzled, forming a composite receptor complex for canonical Wnt signaling. Best described for LRP6 in *Xenopus*, binding of Wnt ligands to this co-receptor complex induces phosphorylation of the intracellular domain of LRP6 by casein kinase 1 $\gamma$ , resulting in association of LRP6-Frizzled with the negative regulator Axin (Fig. 4A) (Davidson et al., 2005; Zeng et al., 2005; Bilic et al., 2007). Sequestration of Axin, in turn, stabilizes the intracellular Wnt signaling machinery, ultimately resulting in induction of transcription factors of the TCF/LEF family (reviewed by He et al., 2004; Niehrs and Shen, 2010; Clevers and Nusse, 2012). Expression of LRP6 at the cell surface is controlled by the secreted Wnt inhibitor Dickkopf (Dkk) (Bafico et al., 2001; Mao et al., 2001). Dkk links LRP6 to Kremen, a transmembrane protein that induces rapid endocytosis of LRP6 molecules to antagonize Wnt signaling (Mao et al., 2002; Ahn et al., 2011). The Arrow/LRP6 pathway described above is implicated in early patterning of the body plan in *Drosophila*, *Xenopus* and mouse. LRP5 operates by a similar mechanism, but its role in WNT signaling in mammals seems to be more restricted (e.g. to bone and retina formation) as judged from phenotypes of mouse models and patients with *LRP5* mutations (Table 1).

As well as controlling signaling through FGF, BMP and WNT ligands, two LRP4s have also been shown to modulate HH-dependent pathways. Thus, the cellular uptake of SHH by LRP1 (Capurro et al., 2012) and LRP2 (McCarthy et al., 2002; Morales et al., 2006) has been recognized. Lately, the significance of this interaction for embryonic development has been uncovered for LRP2. This receptor is expressed in the neuroepithelium, which gives rise to various parts of the central nervous system. Lack of LRP2 expression results in abnormal dorsoventral patterning of the neural tube, causing severe forebrain malformations in mouse models and patients (Willnow et al., 1996; Spoelgen et al., 2005; Kantarci et al., 2007). The underlying defect was traced to an inability of SHH to establish its signaling domain in the forebrain organizer region of the ventral rostral neural tube despite proper expression of HH signaling components, including the receptor patched 1 (PTCH1) and the effector smoothened (SMO) (Christ et al., 2012). Now, detailed studies have revealed how LRP2 acts as an auxiliary surface binding site for SHH in neuroepithelial cells

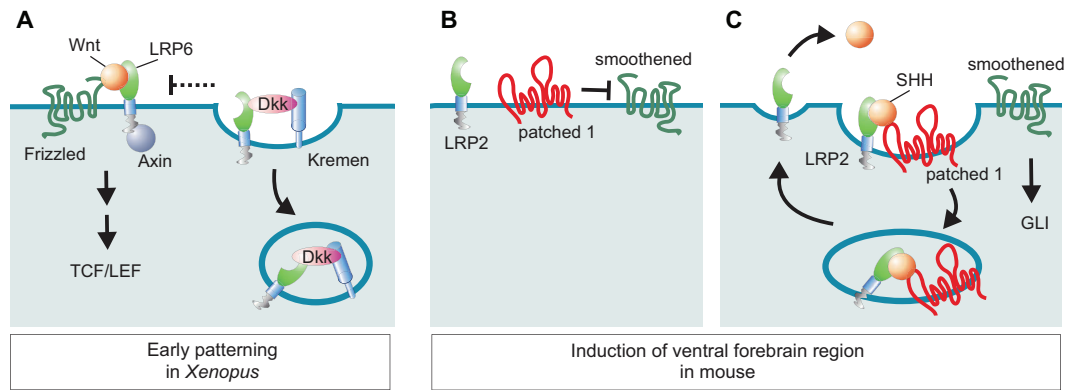

**Fig. 4. LRPs modulate signal reception through endocytosis.** (A) In *Xenopus*, Wnt ligands induce canonical signaling by binding to a co-receptor complex of LRP6 and Frizzled, causing phosphorylation-dependent binding of Axin to the LRP6 tail. This sequestration of Axin stabilizes components of the intracellular Wnt signaling pathway, resulting in induction of target genes through TCF/LEF transcription factors. Dickkopf (Dkk) antagonizes Wnt signals by coupling LRP6 to Kremen for endocytic removal from the cell surface. (B) Cells in the ventral neuroepithelium of the developing mammalian forebrain express a co-receptor complex composed of LRP2 and patched 1. In the absence of the ligand SHH, patched 1 inhibits the effector smoothened. (C) Binding of SHH to LRP2-patched 1 induces uptake of receptor-ligand complexes and releases the patched 1-mediated block of smoothened, resulting in target gene induction through GLI transcription factors. The internalized SHH is recycled by LRP2, which is likely to increase local morphogen concentration further.

(Fig. 4B,C). The binding of SHH to LRP2 facilitates internalization of PTCH1, in a step that is essential for inducing SMO activity. In addition, LRP2 may mediate re-secretion of SHH, which is likely to increase further the concentrations of the morphogen within its target field (Christ et al., 2012). A similar function in local enrichment of SHH has been proposed for LRP2 during optic nerve development (Ortega et al., 2012). In line with this role, previous findings identified a requirement for SHH-binding proteins, such as growth arrest-specific 1 (GAS1), CAM-related/downregulated by oncogenes (CDO; CDO1) and brother of CDO (BOC) in HH signaling in the spinal cord (Tenzen et al., 2006; Martinelli and Fan, 2007; Allen et al., 2011; Izzi et al., 2011).

## Conclusion

Beginning with the identification of a group of alleged lipoprotein receptors, recent years witnessed the elucidation of LRPs as morphogen-binding proteins important in the control of embryonic development. Still, the relevance of these endocytic receptors is not limited to morphogen signal reception. Rather, studies have also firmly established the significance of several of these receptors in control of cellular and systemic lipoprotein metabolism. Thus, impaired energy homeostasis and dyslipidemia have been documented in mouse models with deficiencies in the genes encoding LRP1, VLDLR, LRP5 and LRP6 (Table 1). Missense mutations in *LRP6* cause metabolic syndrome (see Glossary, Box 2) in an autosomal dominant inheritable trait in humans (Table 1). Furthermore, impaired cholesterol biosynthesis, as in patients with Smith-Lemli-Optiz syndrome (see Glossary, Box 2), causes holoprosencephaly (HPE), arguing for a mechanistic link between cholesterol metabolism and developmental pathways. Perhaps control of lipid homeostasis and morphogen signaling are just two unrelated functions performed by receptors with dual functionality? More exciting is the idea that both biological concepts have more in common than previously anticipated. Perhaps metabolism and energy homeostasis modulates morphogen signaling in embryonic and adult organisms, or, in the converse situation, morphogens have previously unrecognized functions in control of metabolism. Clearly, LRPs would be perfectly equipped to integrate both tasks.

## Acknowledgements

We are indebted to Miguel Andrade-Navarro and Arvind Mer for help with computational analyses.

## Funding

Studies by the authors described in this article were funded in part by the Deutsche Forschungsgemeinschaft.

## Competing interests statement

The authors declare no competing financial interests.

## References

- Ahn, V. E., Chu, M. L., Choi, H. J., Tran, D., Abo, A. and Weis, W. I. (2011). Structural basis of Wnt signaling inhibition by Dickkopf binding to LRP5/6. *Dev. Cell* **21**, 862-873.
- Allen, B. L., Song, J. Y., Izzi, L., Althaus, I. W., Kang, J. S., Charron, F., Krauss, R. S. and McMahon, A. P. (2011). Overlapping roles and collective requirement for the coreceptors GAS1, CDO, and BOC in SHH pathway function. *Dev. Cell* **20**, 775-787.
- Andrade, N., Komnenovic, V., Blake, S. M., Jossin, Y., Howell, B., Goffinet, A., Schneider, W. J. and Nimpf, J. (2007). ApoER2/VLDL receptor and Dab1 in the rostral migratory stream function in postnatal neuronal migration independently of Reelin. *Proc. Natl. Acad. Sci. USA* **104**, 8508-8513.
- Baffico, A., Liu, G., Yaniv, A., Gazit, A. and Aaronson, S. A. (2001). Novel mechanism of Wnt signalling inhibition mediated by Dickkopf-1 interaction with LRP6/Arrow. *Nat. Cell Biol.* **3**, 683-686.
- Bilic, J., Huang, Y. L., Davidson, G., Zimmermann, T., Cruciati, C. M., Bienz, M. and Niehrs, C. (2007). Wnt induces LRP6 signalosomes and promotes dishevelled-dependent LRP6 phosphorylation. *Science* **316**, 1619-1622.
- Bock, H. H., Jossin, Y., May, P., Bergner, O. and Herz, J. (2004). Apolipoprotein E receptors are required for reelin-induced proteasomal degradation of the neuronal adaptor protein Disabled-1. *J. Biol. Chem.* **279**, 33471-33479.
- Boycott, K. M., Flavelle, S., Bureau, A., Glass, H. C., Fujiwara, T. M., Wirrell, E., Davey, K., Chudley, A. E., Scott, J. N., McLeod, D. R. et al. (2005). Homozygous deletion of the very low density lipoprotein receptor gene causes autosomal recessive cerebellar hypoplasia with cerebral gyral simplification. *Am. J. Hum. Genet.* **77**, 477-483.
- Boyden, L. M., Mao, J., Belsky, J., Mitzner, L., Farhi, A., Mitnick, M. A., Wu, D., Insogna, K. and Lifton, R. P. (2002). High bone density due to a mutation in LDL-receptor-related protein 5. *N. Engl. J. Med.* **346**, 1513-1521.
- Bujo, H., Yamamoto, T., Hayashi, K., Hermann, M., Nimpf, J. and Schneider, W. J. (1995). Mutant oocyte low density lipoprotein receptor gene family member causes atherosclerosis and female sterility. *Proc. Natl. Acad. Sci. USA* **92**, 9905-9909.
- Capurro, M. I., Shi, W. and Filmus, J. (2012). LRP1 mediates Hedgehog-induced endocytosis of the GPC3-Hedgehog complex. *J. Cell Sci.* **125**, 3380-3389.
- Carter, M., Chen, X., Slowinska, B., Minnerath, S., Glickstein, S., Shi, L., Campagne, F., Weinstein, H. and Ross, M. E. (2005). Crooked tail (Cd) model of human folate-responsive neural tube defects is mutated in Wnt coreceptor



- lipoprotein receptor-related protein 6. *Proc. Natl. Acad. Sci. USA* **102**, 12843-12848.
- Chen, J., Honeyager, S. M., Schleede, J., Avanesov, A., Laughon, A. and Blair, S. S. (2012). Crossveinless d is a vitellogenin-like lipoprotein that binds BMPs and HSPGs, and is required for normal BMP signaling in the *Drosophila* wing. *Development* **139**, 2170-2176.
- Choi, H. Y., Dieckmann, M., Herz, J. and Niemeier, A. (2009). Lrp4, a novel receptor for Dickkopf 1 and sclerostin, is expressed by osteoblasts and regulates bone growth and turnover in vivo. *PLoS ONE* **4**, e7930.
- Christ, A., Christa, A., Kur, E., Lioubinski, O., Bachmann, S., Willnow, T. E. and Hammes, A. (2012). LRP2 is an auxiliary SHH receptor required to condition the forebrain ventral midline for inductive signals. *Dev. Cell* **22**, 268-278.
- Clevers, H. and Nusse, R. (2012). Wnt/ $\beta$ -catenin signaling and disease. *Cell* **149**, 1192-1205.
- Davidson, G., Wu, W., Shen, J., Bilic, J., Fenger, U., Stannek, P., Glinka, A. and Niehrs, C. (2005). Casein kinase 1 gamma couples Wnt receptor activation to cytoplasmic signal transduction. *Nature* **438**, 867-872.
- Dietrich, M. F., van der Weyden, L., Prosser, H. M., Bradley, A., Herz, J. and Adams, D. J. (2010). Ectodomains of the LDL receptor-related proteins LRP1b and LRP4 have anchorage independent functions in vivo. *PLoS ONE* **5**, e9960.
- DiMario, P. J. and Mahowald, A. P. (1987). Female sterile (1) yolkless: a recessive female sterile mutation in *Drosophila melanogaster* with depressed numbers of coated pits and coated vesicles within the developing oocytes. *J. Cell Biol.* **105**, 199-206.
- Drögemüller, C., Leeb, T., Harlizius, B., Tammen, I., Distl, O., Höltershinken, M., Gentile, A., Duchesne, A. and Eggen, A. (2007). Congenital syndactyly in cattle: four novel mutations in the low density lipoprotein receptor-related protein 4 gene (LRP4). *BMC Genet.* **8**, 5.
- Duchesne, A., Gautier, M., Chadi, S., Grohs, C., Floriot, S., Gallard, Y., Caste, G., Ducos, A. and Eggen, A. (2006). Identification of a doublet missense substitution in the bovine LRP4 gene as a candidate causal mutation for syndactyly in Holstein cattle. *Genomics* **88**, 610-621.
- Entchev, E. V., Schwabedissen, A. and González-Gaitán, M. (2000). Gradient formation of the TGF-beta homolog Dpp. *Cell* **103**, 981-992.
- Fujino, T., Asaba, H., Kang, M. J., Ikeda, Y., Sone, H., Takada, S., Kim, D. H., Ioka, R. X., Ono, M., Tomoyori, H. et al. (2003). Low-density lipoprotein receptor-related protein 5 (LRP5) is essential for normal cholesterol metabolism and glucose-induced insulin secretion. *Proc. Natl. Acad. Sci. USA* **100**, 229-234.
- Gajera, C. R., Emich, H., Lioubinski, O., Christ, A., Beckervordersandforth-Bonk, R., Yoshikawa, K., Bachmann, S., Christensen, E. I., Götz, M., Kempermann, G. et al. (2010). LRP2 in ependymal cells regulates BMP signaling in the adult neurogenic niche. *J. Cell Sci.* **123**, 1922-1930.
- Goldstein, J. L., Hobbs, H. H. and Brown, M. S. (2001) Familial hypercholesterolemia. In *The Metabolic and Molecular Basis of Inherited Disease* (ed. C. R. Scriver, A. L. Beaudet, W. S. Sly, D. Valle, B. Childs, K. W. Kinzler and B. Vogelstein), pp 2863-2913. New York, NY: McGraw-Hill.
- Gomez, A. M. and Burden, S. J. (2011). The extracellular region of Lrp4 is sufficient to mediate neuromuscular synapse formation. *Dev. Dyn.* **240**, 2626-2633.
- Gong, Y., Slee, R. B., Fukai, N., Rawadi, G., Roman-Roman, S., Reginato, A. M., Wang, H., Cundy, T., Glorieux, F. H., Lev, D. et al. (2001). LDL receptor-related protein 5 (LRP5) affects bone accrual and eye development. *Cell* **107**, 513-523.
- Grant, B. and Hirsh, D. (1999). Receptor-mediated endocytosis in the *Caenorhabditis elegans* oocyte. *Mol. Biol. Cell* **10**, 4311-4326.
- Hack, I., Hellwig, S., Junghans, D., Brunne, B., Bock, H. H., Zhao, S. and Frotscher, M. (2007). Divergent roles of ApoER2 and Vldlr in the migration of cortical neurons. *Development* **134**, 3883-3891.
- Hammes, A., Andreassen, T. K., Spoelgen, R., Raila, J., Hubner, N., Schulz, H., Metzger, J., Schweigert, F. J., Luppa, P. B., Nykjaer, A. et al. (2005). Role of endocytosis in cellular uptake of sex steroids. *Cell* **122**, 751-762.
- He, X., Semenov, M., Tamai, K. and Zeng, X. (2004). LDL receptor-related proteins 5 and 6 in Wnt/ $\beta$ -catenin signaling: arrows point the way. *Development* **131**, 1663-1677.
- Herz, J. and Chen, Y. (2006). Reelin, lipoprotein receptors and synaptic plasticity. *Nat. Rev. Neurosci.* **7**, 850-859.
- Herz, J., Clouthier, D. E. and Hammer, R. E. (1992). LDL receptor-related protein internalizes and degrades uPA-PAI-1 complexes and is essential for embryo implantation. *Cell* **71**, 411-421.
- Ishibashi, S., Brown, M. S., Goldstein, J. L., Gerard, R. D., Hammer, R. E. and Herz, J. (1993). Hypercholesterolemia in low density lipoprotein receptor knockout mice and its reversal by adenovirus-mediated gene delivery. *J. Clin. Invest.* **92**, 883-893.
- Izzi, L., Lévesque, M., Morin, S., Laniel, D., Wilkes, B. C., Mille, F., Krauss, R. S., McMahon, A. P., Allen, B. L. and Charron, F. (2011). Boc and Gas1 each form distinct Shh receptor complexes with Ptc1 and are required for Shh-mediated cell proliferation. *Dev. Cell* **20**, 788-801.
- Johnson, E. B., Hammer, R. E. and Herz, J. (2005). Abnormal development of the apical ectodermal ridge and polysyndactyly in Megf7-deficient mice. *Hum. Mol. Genet.* **14**, 3523-3538.
- Johnson, E. B., Steffen, D. J., Lynch, K. W. and Herz, J. (2006). Defective splicing of Megf7/Lrp4, a regulator of distal limb development, in autosomal recessive mulefoot disease. *Genomics* **88**, 600-609.
- Kamikura, D. M. and Cooper, J. A. (2003). Lipoprotein receptors and a disabled family cytoplasmic adaptor protein regulate EGL-17/FGF export in *C. elegans*. *Genes Dev.* **17**, 2798-2811.
- Kantarci, S., Al-Gazali, L., Hill, R. S., Donnai, D., Black, G. C., Bieth, E., Chassaing, N., Lacombe, D., Devriendt, K., Teebi, A. et al. (2007). Mutations in LRP2, which encodes the multiligand receptor megalin, cause Donnai-Barrow and facio-oculo-acoustico-renal syndromes. *Nat. Genet.* **39**, 957-959.
- Karner, C. M., Dietrich, M. F., Johnson, E. B., Kappesser, N., Tennert, C., Percin, F., Wollnik, B., Carroll, T. J. and Herz, J. (2010). Lrp4 regulates initiation of ureteric budding and is crucial for kidney formation – a mouse model for Cenani-Lenz syndrome. *PLoS ONE* **5**, e10418.
- Kato, M., Patel, M. S., Levasseur, R., Lobov, I., Chang, B. H., Glass, D. A., 2nd, Hartmann, C., Li, L., Hwang, T. H., Brayton, C. F. et al. (2002). Cbfa1-independent decrease in osteoblast proliferation, osteopenia, and persistent embryonic eye vascularization in mice deficient in Lrp5, a Wnt coreceptor. *J. Cell Biol.* **157**, 303-314.
- Kim, N., Stiegler, A. L., Cameron, T. O., Hallock, P. T., Gomez, A. M., Huang, J. H., Hubbard, S. R., Dustin, M. L. and Burden, S. J. (2008). Lrp4 is a receptor for Agrin and forms a complex with MuSK. *Cell* **135**, 334-342.
- Kriegstein, A. and Alvarez-Buylla, A. (2009). The glial nature of embryonic and adult neural stem cells. *Annu. Rev. Neurosci.* **32**, 149-184.
- Kur, E., Christa, A., Veth, K. N., Gajera, C. R., Andrade-Navarro, M. A., Zhang, J., Willer, J. R., Gregg, R. G., Abdelilah-Seyfried, S., Bachmann, S. et al. (2011). Loss of Lrp2 in zebrafish disrupts pronephric tubular clearance but not forebrain development. *Dev. Dyn.* **240**, 1567-1577.
- Li, Y., Pawlik, B., Elcioglu, N., Aglan, M., Kayserili, H., Yigit, G., Percin, F., Goodman, F., Nürnberg, G., Cenani, A. et al. (2010). LRP4 mutations alter Wnt/ $\beta$ -catenin signaling and cause limb and kidney malformations in Cenani-Lenz syndrome. *Am. J. Hum. Genet.* **86**, 696-706.
- Lindvall, C., Evans, N. C., Zylstra, C. R., Li, Y., Alexander, C. M. and Williams, B. O. (2006). The Wnt signaling receptor Lrp5 is required for mammary ductal stem cell activity and Wnt1-induced tumorigenesis. *J. Biol. Chem.* **281**, 35081-35087.
- Little, R. D., Carulli, J. P., Del Mastro, R. G., Dupuis, J., Osborne, M., Folz, C., Manning, S. P., Swain, P. M., Zhao, S. C., Eustace, B. et al. (2002). A mutation in the LDL receptor-related protein 5 gene results in the autosomal dominant high-bone-mass trait. *Am. J. Hum. Genet.* **70**, 11-19.
- Liu, C. X., Musco, S., Lisitsina, N. M., Forgacs, E., Minna, J. D. and Lisitsyn, N. A. (2000). LRP-DIT, a putative endocytic receptor gene, is frequently inactivated in non-small cell lung cancer cell lines. *Cancer Res.* **60**, 1961-1967.
- Liu, W., Singh, R., Choi, C. S., Lee, H. Y., Keramati, A. R., Samuel, V. T., Lifton, R. P., Shulman, G. I. and Mani, A. (2012). Low density lipoprotein (LDL) receptor-related protein 6 (LRP6) regulates body fat and glucose homeostasis by modulating nutrient sensing pathways and mitochondrial energy expenditure. *J. Biol. Chem.* **287**, 7213-7223.
- Mani, A., Radhakrishnan, J., Wang, H., Mani, A., Mani, M. A., Nelson-Williams, C., Carew, K. S., Mane, S., Najmabadi, H., Wu, D. et al. (2007). LRP6 mutation in a family with early coronary disease and metabolic risk factors. *Science* **315**, 1278-1282.
- Mao, B., Wu, W., Li, Y., Hoppe, D., Stannek, P., Glinka, A. and Niehrs, C. (2001). LDL-receptor-related protein 6 is a receptor for Dickkopf proteins. *Nature* **411**, 321-325.
- Mao, B., Wu, W., Davidson, G., Marhold, J., Li, M., Mechler, B. M., Delius, H., Hoppe, D., Stannek, P., Walter, C. et al. (2002). Kremen proteins are Dickkopf receptors that regulate Wnt/ $\beta$ -catenin signalling. *Nature* **417**, 664-667.
- Martinelli, D. C. and Fan, C. M. (2007). Gas1 extends the range of Hedgehog action by facilitating its signaling. *Genes Dev.* **21**, 1231-1243.
- McCarthy, R. A., Barth, J. L., Chintalapudi, M. R., Knaak, C. and Argraves, W. S. (2002). Megalin functions as an endocytic sonic hedgehog receptor. *J. Biol. Chem.* **277**, 25660-25667.
- McMahon, H. T. and Boucrot, E. (2011). Molecular mechanism and physiological functions of clathrin-mediated endocytosis. *Nat. Rev. Mol. Cell Biol.* **12**, 517-533.
- Morales, C. R., Zeng, J., El Alfy, M., Barth, J. L., Chintalapudi, M. R., McCarthy, R. A., Incardona, J. P. and Argraves, W. S. (2006). Epithelial trafficking of Sonic hedgehog by megalin. *J. Histochem. Cytochem.* **54**, 1115-1127.
- Morris, S. M., Tallquist, M. D., Rock, C. O. and Cooper, J. A. (2002). Dual roles for the Dab2 adaptor protein in embryonic development and kidney transport. *EMBO J.* **21**, 1555-1564.
- Niehrs, C. and Shen, J. (2010). Regulation of Lrp6 phosphorylation. *Cell. Mol. Life Sci.* **67**, 2551-2562.



- Ohazama, A., Johnson, E. B., Ota, M. S., Choi, H. Y., Porntaveetus, T., Oommen, S., Itoh, N., Eto, K., Gritli-Linde, A., Herz, J. et al. (2008). Lrp4 modulates extracellular integration of cell signaling pathways in development. *PLoS ONE* **3**, e4092.
- Ohazama, A., Porntaveetus, T., Ota, M. S., Herz, J. and Sharpe, P. T. (2010). Lrp4: A novel modulator of extracellular signaling in craniofacial organogenesis. *Am. J. Med. Genet.* **152A**, 2974-2983.
- Ortega, M. C., Cases, O., Merchán, P., Kozyraki, R., Clemente, D. and de Castro, F. (2012). Megalin mediates the influence of sonic hedgehog on oligodendrocyte precursor cell migration and proliferation during development. *Glia* **60**, 851-866.
- Ozcelik, T., Akarsu, N., Uz, E., Caglayan, S., Gulsuner, S., Onat, O. E., Tan, M. and Tan, U. (2008). Mutations in the very low-density lipoprotein receptor VLDLR cause cerebellar hypoplasia and quadrupedal locomotion in humans. *Proc. Natl. Acad. Sci. USA* **105**, 4232-4236.
- Panáková, D., Sprong, H., Marois, E., Thiele, C. and Eaton, S. (2005). Lipoprotein particles are required for Hedgehog and Wingless signalling. *Nature* **435**, 58-65.
- Pinson, K. I., Brennan, J., Monkley, S., Avery, B. J. and Skarnes, W. C. (2000). An LDL-receptor-related protein mediates Wnt signalling in mice. *Nature* **407**, 535-538.
- Riedel, F., Vorkel, D. and Eaton, S. (2011). Megalin-dependent yellow endocytosis restricts melanization in the *Drosophila* cuticle. *Development* **138**, 149-158.
- Roebroek, A. J., Reekmans, S., Lauwers, A., Feyaerts, N., Smeijers, L. and Hartmann, D. (2006). Mutant Lrp1 knock-in mice generated by recombinase-mediated cassette exchange reveal differential importance of the NPXY motifs in the intracellular domain of LRP1 for normal fetal development. *Mol. Cell. Biol.* **26**, 605-616.
- Rogers, K. W. and Schier, A. F. (2011). Morphogen gradients: from generation to interpretation. *Annu. Rev. Cell Dev. Biol.* **27**, 377-407.
- Rosenfeld, J. A., Ballif, B. C., Martin, D. M., Aylsworth, A. S., Bejjani, B. A., Torchia, B. S. and Shaffer, L. G. (2010). Clinical characterization of individuals with deletions of genes in holoprosencephaly pathways by aCGH refines the phenotypic spectrum of HPE. *Hum. Genet.* **127**, 421-440.
- Rudenko, G., Henry, L., Henderson, K., Ichtchenko, K., Brown, M. S., Goldstein, J. L. and Deisenhofer, J. (2002). Structure of the LDL receptor extracellular domain at endosomal pH. *Science* **298**, 2353-2358.
- Schonbaum, C. P., Lee, S. and Mahowald, A. P. (1995). The *Drosophila* yolkless gene encodes a vitellogenin receptor belonging to the low density lipoprotein receptor superfamily. *Proc. Natl. Acad. Sci. USA* **92**, 1485-1489.
- Sentürk, A., Pfennig, S., Weiss, A., Burk, K. and Acker-Palmer, A. (2011). Ephrin Bs are essential components of the Reelin pathway to regulate neuronal migration. *Nature* **472**, 356-360.
- Simon-Chazottes, D., Tutois, S., Kuehn, M., Evans, M., Bourgade, F., Cook, S., Davison, M. T. and Guénet, J. L. (2006). Mutations in the gene encoding the low-density lipoprotein receptor LRP4 cause abnormal limb development in the mouse. *Genomics* **87**, 673-677.
- Song, L., Li, Y., Wang, K., Wang, Y. Z., Molotkov, A., Gao, L., Zhao, T., Yamagami, T., Wang, Y., Gan, Q. et al. (2009). Lrp6-mediated canonical Wnt signaling is required for lip formation and fusion. *Development* **136**, 3161-3171.
- Song, L., Li, Y., Wang, K. and Zhou, C. J. (2010). Cardiac neural crest and outflow tract defects in Lrp6 mutant mice. *Dev. Dyn.* **239**, 200-210.
- Sonoda, I., Imoto, I., Inoue, J., Shibata, T., Shimada, Y., Chin, K., Imamura, M., Amagasa, T., Gray, J. W., Hirohashi, S. et al. (2004). Frequent silencing of low density lipoprotein receptor-related protein 1B (LRP1B) expression by genetic and epigenetic mechanisms in esophageal squamous cell carcinoma. *Cancer Res.* **64**, 3741-3747.
- Spoelgen, R., Hammes, A., Anzenberger, U., Zechner, D., Andersen, O. M., Jerchow, B. and Willnow, T. E. (2005). LRP2/megalin is required for patterning of the ventral telencephalon. *Development* **132**, 405-414.
- Tamai, K., Semenov, M., Kato, Y., Spokony, R., Liu, C., Katsuyama, Y., Hess, F., Saint-Jeannet, J. P. and He, X. (2000). LDL-receptor-related proteins in Wnt signal transduction. *Nature* **407**, 530-535.
- Tenzen, T., Allen, B. L., Cole, F., Kang, J. S., Krauss, R. S. and McMahon, A. P. (2006). The cell surface membrane proteins Cdo and Boc are components and targets of the Hedgehog signaling pathway and feedback network in mice. *Dev. Cell* **10**, 647-656.
- Toomes, C., Bottomley, H. M., Jackson, R. M., Towns, K. V., Scott, S., Mackey, D. A., Craig, J. E., Jiang, L., Yang, Z., Trembath, R. et al. (2004). Mutations in LRP5 or FZD4 underlie the common familial exudative vitreoretinopathy locus on chromosome 11q. *Am. J. Hum. Genet.* **74**, 721-730.
- Trommsdorff, M., Gotthardt, M., Hiesberger, T., Shelton, J., Stockinger, W., Nimpf, J., Hammer, R. E., Richardson, J. A. and Herz, J. (1999). Reeler/Disabled-like disruption of neuronal migration in knockout mice lacking the VLDL receptor and ApoE receptor 2. *Cell* **97**, 689-701.
- Trotter, J. H., Klein, M., Jinwal, U. K., Abisambra, J. F., Dickey, C. A., Tharkur, J., Masiulis, I., Ding, J., Locke, K. G., Rickman, C. B. et al. (2011). ApoER2 function in the establishment and maintenance of retinal synaptic connectivity. *J. Neurosci.* **31**, 14413-14423.
- Veth, K. N., Willer, J. R., Collery, R. F., Gray, M. P., Willer, G. B., Wagner, D. S., Mullins, M. C., Udvadia, A. J., Smith, R. S., John, S. W. M. et al. (2011). Mutations in zebrafish *lrp2* result in adult-onset ocular pathogenesis that models myopia and other risk factors for glaucoma. *PLoS Genet.* **7**, e1001310.
- Weatherbee, S. D., Anderson, K. V. and Niswander, L. A. (2006). LDL-receptor-related protein 4 is crucial for formation of the neuromuscular junction. *Development* **133**, 4993-5000.
- Wehrli, M., Dougan, S. T., Caldwell, K., O'Keefe, L., Schwartz, S., Vaizel-Ohayon, D., Schejter, E., Tomlinson, A. and DiNardo, S. (2000). arrow encodes an LDL-receptor-related protein essential for Wingless signalling. *Nature* **407**, 527-530.
- Wicher, G. and Aldskogius, H. (2008). Megalin deficiency induces critical changes in mouse spinal cord development. *Neuroreport* **19**, 559-563.
- Willnow, T. E., Hilpert, J., Armstrong, S. A., Rohlmann, A., Hammer, R. E., Burns, D. K. and Herz, J. (1996). Defective forebrain development in mice lacking gp330/megalin. *Proc. Natl. Acad. Sci. USA* **93**, 8460-8464.
- Ye, X., Wang, Y., Cahill, H., Yu, M., Badea, T. C., Smallwood, P. M., Peachey, N. S. and Nathans, J. (2009). Norrin, frizzled-4, and Lrp5 signaling in endothelial cells controls a genetic program for retinal vascularization. *Cell* **139**, 285-298.
- Yochem, J., Tuck, S., Greenwald, I. and Han, M. (1999). A gp330/megalin-related protein is required in the major epidermis of *Caenorhabditis elegans* for completion of molting. *Development* **126**, 597-606.
- Zeng, X., Tamai, K., Doble, B., Li, S., Huang, H., Habas, R., Okamura, H., Woodgett, J. and He, X. (2005). A dual-kinase mechanism for Wnt co-receptor phosphorylation and activation. *Nature* **438**, 873-877.
- Zhang, B., Luo, S., Wang, Q., Suzuki, T., Xiong, W. C. and Mei, L. (2008). LRP4 serves as a coreceptor of agrin. *Neuron* **60**, 285-297.
- Zhou, C. J., Borello, U., Rubenstein, J. L. and Pleasure, S. J. (2006). Neuronal production and precursor proliferation defects in the neocortex of mice with loss of function in the canonical Wnt signaling pathway. *Neuroscience* **142**, 1119-1131.
- Zhou, C. J., Molotkov, A., Song, L., Li, Y., Pleasure, D. E., Pleasure, S. J. and Wang, Y. Z. (2008). Ocular coloboma and dorsoventral neuroretinal patterning defects in Lrp6 mutant eyes. *Dev. Dyn.* **237**, 3681-3689.
- Zhu, A. J. and Scott, M. P. (2004). Incredible journey: how do developmental signals travel through tissue? *Genes Dev.* **18**, 2985-2997.
